# Supplementary material for: Artificial lymph nodes induce potent secondary immune responses in naive and immunodeficient mice
Source: JCI journal article supplement (doi:10.1172/jci30379), 2007-03-16
Supplement: sd1 [file 1]

# Supplemental data

Figure S1.

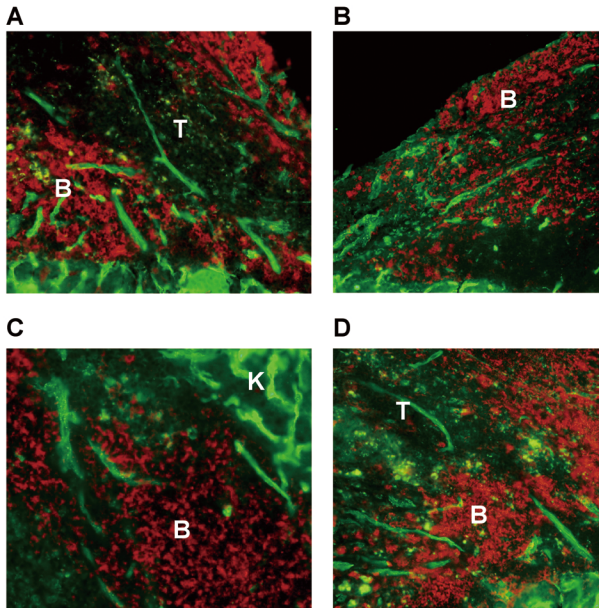

Tomato Lectin **B220**

## Supplemental data

### Figure S1: Immunohistochemical staining of a blood vessel endothelium by tomato lectin

To show blood vessels, we used intravascular perfusion of tomato lectin as reported previously (1). Briefly, under anesthesia, mice were injected intravenously with FITC-conjugated tomato lectin ( *Lycopersicon esculentum* lectin; 100µg lectin per 100µl of buffered saline). After 5 min, the chest was opened and the aorta was perfused via the left ventricle with 4% paraformaldehyde in 0.1 M phosphate buffer (pH 7.2) for 5 min followed by phosphate buffer for 5 min at a pressure of 120 mm Hg. aLNs in recipient BALB/c mouse were stained with Biotin-anti mouse B220 and Streptavidin-Q dot 605.

1. Ezaki T, Baluk P, Thurston G, La Barbara A, Woo C, McDonald DM. Time course of endothelial cell proliferation and microvascular remodeling in chronic inflammation. Am J Pathol., 2001. 158: 2043-2055

T; T cell, B; B cell, K; kidney, green; tomato lectin, red; B220 positive B cells
